# Supplementary material
Source: PubMed Central journal article supplement (PMC4987003)

Supporting Information for:

# Multistage Mass Spectrometry of Phospholipids using Collision-Induced Dissociation (CID) and Metastable Atom-Activated Dissociation (MAD)

*Pengfei Li<sup>1</sup>, William D. Hoffmann<sup>2</sup>, Glen P. Jackson<sup>1,2</sup>*

<sup>1</sup>C. Eugene Bennett Department of Chemistry, West Virginia University, Morgantown, WV  
26506, USA

<sup>2</sup>Department of Forensic and Investigative Science, West Virginia University, Morgantown, WV  
26506, USA

Collisional activation of  $[\text{POPC}+\text{Na}]^{2+}$  at  $m/z$  391.5 at  $\text{MS}^3$  level is shown in Figure S1.

Collisional activation of  $[\text{POPC}+\text{H}]^{2+}$  at  $m/z$  380.2 at  $\text{MS}^3$  level is shown in Figure S2.

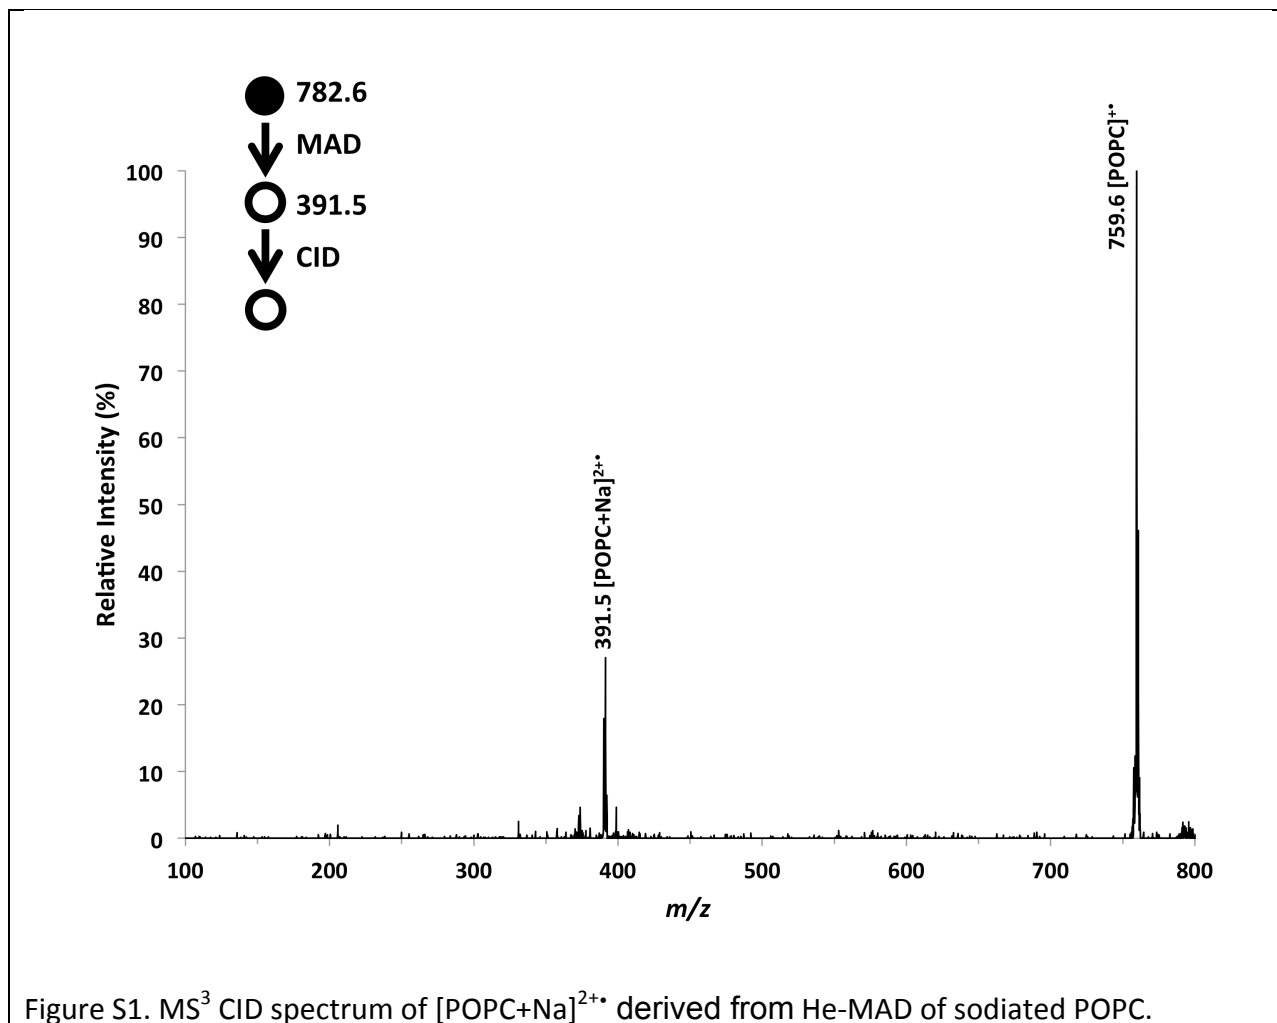

Supplement: NIHMS770817-supplement.pdf [file NIHMS770817-supplement.pdf]
